# Supplementary material for: A serial 3- and 9-year optical coherence tomography assessment of vascular healing response to sirolimus- and paclitaxel-eluting stents
Source: PubMed Central journal article supplement (PMC6373305; doi:10.1007/s10554-018-1437-7), 2018-08-30
Supplement: 10554_2018_1437_MOESM1_ESM.pdf [file 10554_2018_1437_MOESM1_ESM.pdf]

## Suppl. Fig.1

The percentage of neointimal thickness change patterns between 3 and 9 years (A). The percentage of strut coverage change patterns between 3 and 9 years (B).

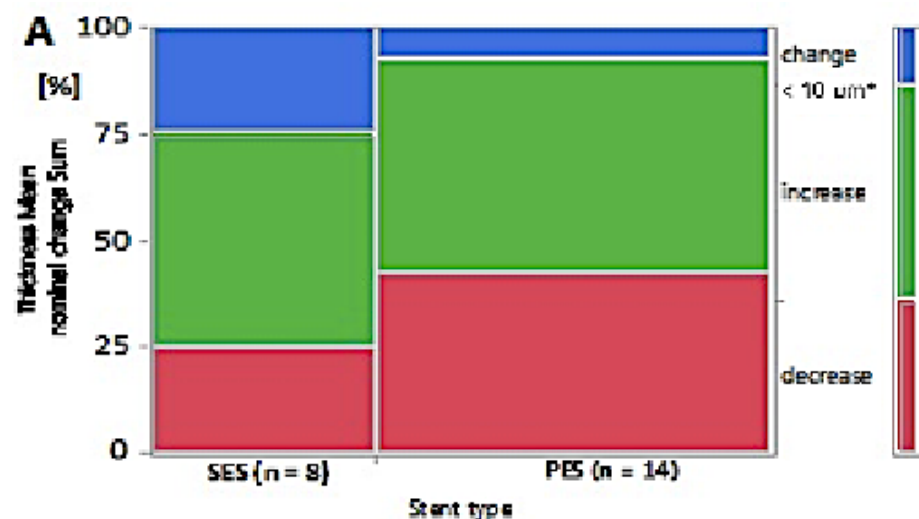

Contingency Analysis of Thickness Mean nominal change 10  $\mu\text{m}$  By Stent type  
Mosaic Plot

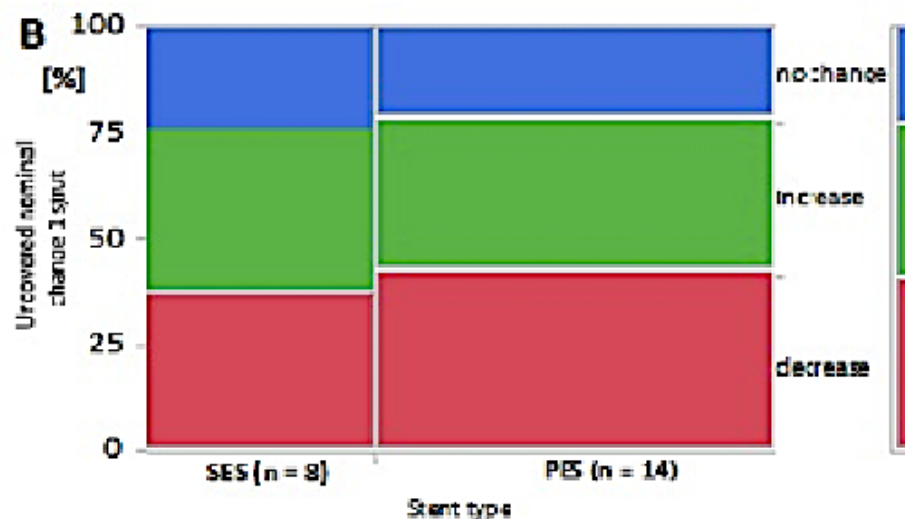

Contingency Analysis of Uncovered nominal change 1 strut By Stent type  
Mosaic Plot

\* The presented NIT change patterns need to be viewed at in the light of the thresholds of optical coherence tomography (OCT) resolution.  
SES- sirolimus-eluting stent, PES – paclitaxel-eluting stent
