# Supplementary material for: A serial 3- and 9-year optical coherence tomography assessment of vascular healing response to sirolimus- and paclitaxel-eluting stents
Source: PubMed Central journal article supplement (PMC6373305; doi:10.1007/s10554-018-1437-7), 2018-08-30
Supplement: 10554_2018_1437_MOESM2_ESM.pdf [file 10554_2018_1437_MOESM2_ESM.pdf]

**Suppl. Fig. 2 Optical coherence tomography (OCT) documentation of strut coverage change patterns in a paired strut-to-strut analysis between 3 and 9 years.**

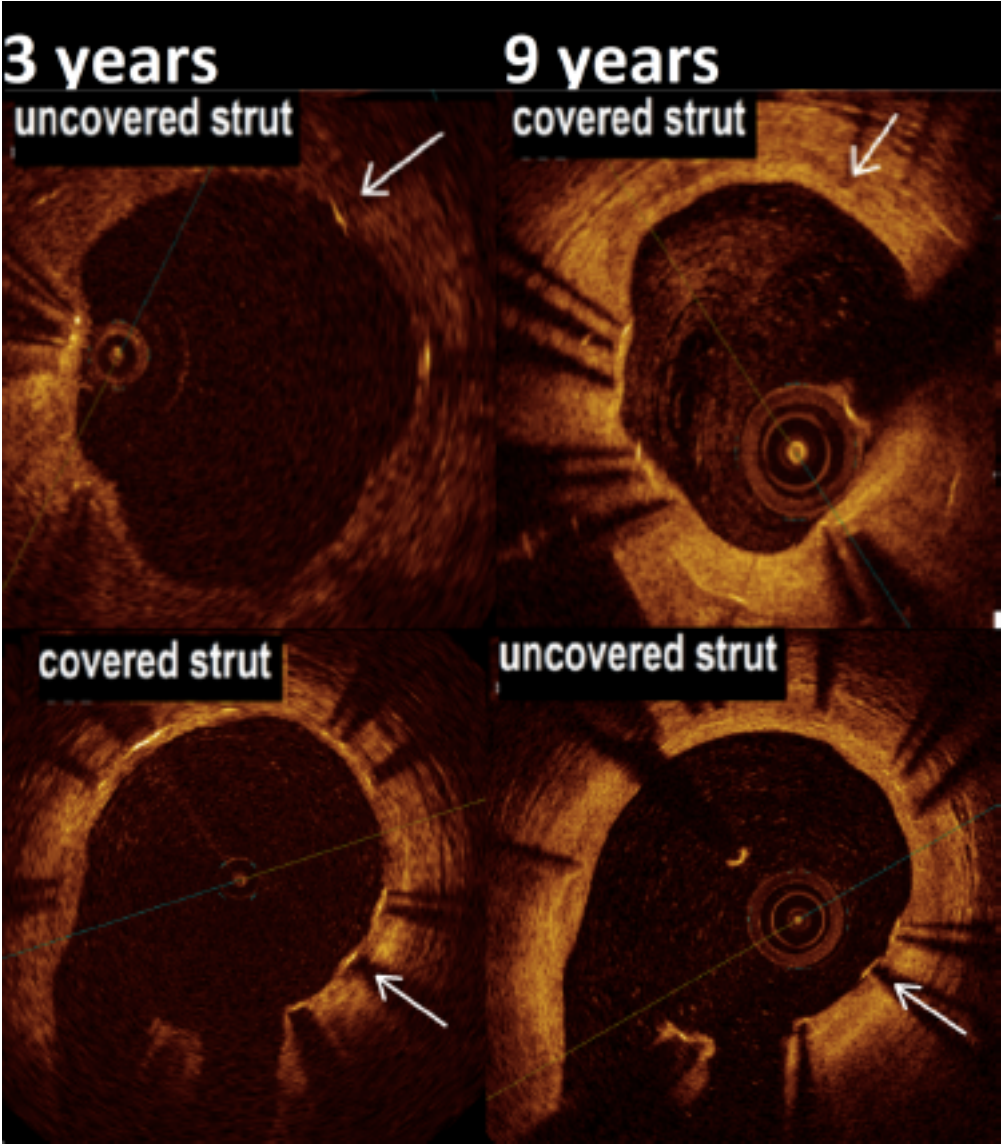

\* The potential neointimal redistribution of neointima in the long – term leading to late uncoverage of some struts has to be viewed at in light of the threshold of optical coherence tomography (OCT) resolution.  
SES- sirolimus-eluting stent, PES – paclitaxel-eluting stent
