# Supplementary material for: A serial 3- and 9-year optical coherence tomography assessment of vascular healing response to sirolimus- and paclitaxel-eluting stents
Source: PubMed Central journal article supplement (PMC6373305; doi:10.1007/s10554-018-1437-7), 2018-08-30
Supplement: 10554_2018_1437_MOESM4_ESM.pdf [file 10554_2018_1437_MOESM4_ESM.pdf]

**Suppl. Fig 4.**

**Strut coverage patterns in the very long-term follow-up.**

**Optical coherent tomography (OCT) serial documentation of change in strut classification in different types of DES. Panels demonstrate tissue growth over PES (A1, B1) and SES (A2, B2) strut at 3- and 9-year OCT follow up. On the panels (A1, A2) the strut pointed by white arrow is classified as well-apposed uncovered strut, whereas white arrow on the panels (B1, B2) point at the same strut already covered in 9-years follow up.**

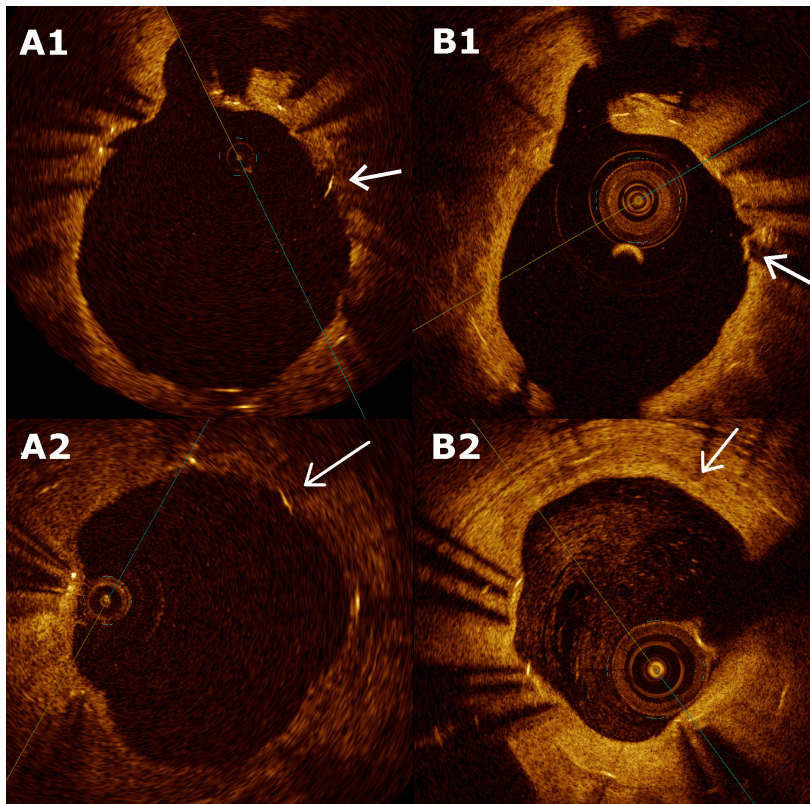

SES- sirolimus-eluting stent, PES – paclitaxel-eluting stent
